# Supplementary material
Source: MDPI journal article supplement (https://www.mdpi.com/2073-4344/10/2/174)

# Supporting Information

## Pd-Ce/ZIF-8 Nanocomposite for Catalytic Extraction of Sinomenine from *Sinomenium Acutum*

Yinghuai Zhu and Zhiyu Bai

<sup>1</sup> School of Pharmacy, Macau University of Science and Technology, Avenida Wai Long, Taipa, Macau 999078, China;

<sup>2</sup> Department of Materials Sciences & Engineering, National University of Singapore, Singapore 117575.

Figure S-1 FT-IR of Pd-Ce/ZIF-8

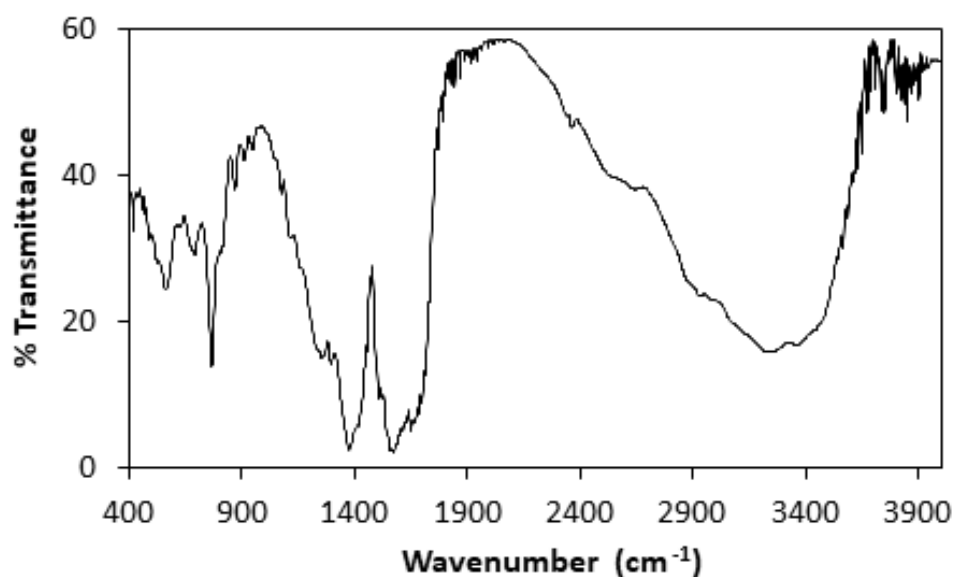

Figure S-2 XPS fitting of Ce 3d

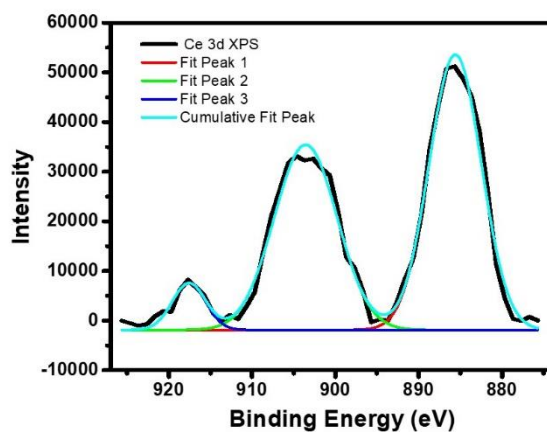

|           | Index(X)             | P0(Y)                | P1(Y)                | P2(Y)                | P3(Y)                | P4(Y)                | P5(Y)                | P6(Y)                | P7(Y)                |
|-----------|----------------------|----------------------|----------------------|----------------------|----------------------|----------------------|----------------------|----------------------|----------------------|
| Long Name | Index                | Area                 | AreaIntgP(%)         | Row Index            | Beginning X          | Ending X             | FWHM                 | Center               | Height               |
| Units     |                      |                      |                      |                      |                      |                      |                      |                      |                      |
| Comments  | Integral Result of B |
| 1         | 1                    | 386252.18848         | 48.04868             | 10                   | 879.68               | 893.68               | 7.60576              | 885.68               | 50383.04652          |
| 2         | 2                    | 362910.18279         | 45.145               | 29                   | 895.68               | 913.68               | 9.54308              | 904.68               | 36056.87391          |
| 3         | 3                    | 35774.51303          | 4.45025              | 42                   | 913.68               | 919.68               | 3.81752              | 917.68               | 8912.19879           |
| 4         |                      |                      |                      |                      |                      |                      |                      |                      |                      |

Figure S-3 XPS fitting of Pd 3d

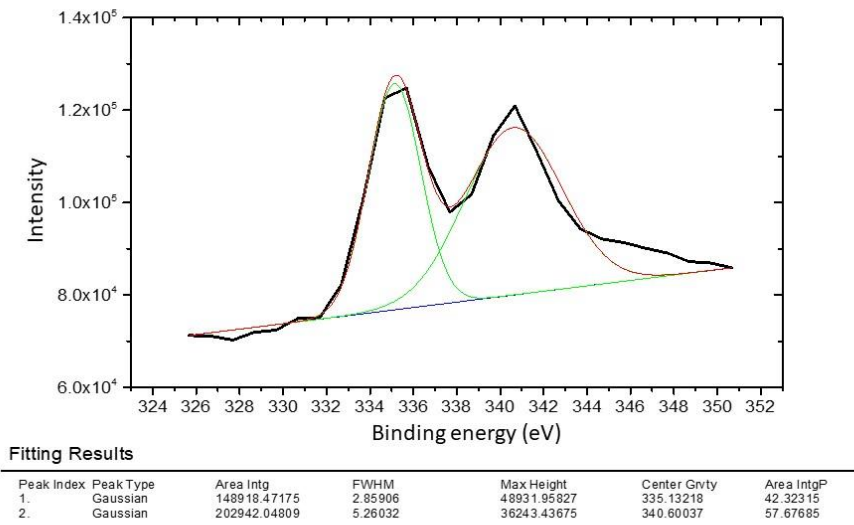

Supplement: s1 [file s1]
